# Supplementary material for: Driving on a highway to hell I found the stairway to heaven. A mentorship lecture intermixed with rock music and a quiz
Source: publisher site journal article supplement (doi:10.1515/dx-2019-0056), 2019-08-07
Supplement: Supplementary file 1 [file dx-2019-0056_suppl.docx]

Supplementary Table 1: **MUSIC QUIZ SCORESHEET**

**RULES:**

**HARD GAME**- Write down the artist of the song *BEFORE* the video plays (12 seconds)

**EASY GAME**- Write down the artist of the song *AFTER* the video plays

Rate the mentorship quote from 1-10, with 1 being the worst and 10 being the best

| **SONG NUMBER** | **HARD GAME- ARTIST** | **EASY GAME- ARTIST** | **QUOTE RATING** |
| --- | --- | --- | --- |
| 1 |  |  |  |
| 2 |  |  |  |
| 3 |  |  |  |
| 4 |  |  |  |
| 5 |  |  |  |
| 6 |  |  |  |
| 7 |  |  |  |
| 8 |  |  |  |
| 9 |  |  |  |
| 10 |  |  |  |
| 11 |  |  |  |
| 12 |  |  |  |
| 13 |  |  |  |
| 14 |  |  |  |
| 15 |  |  |  |
| 16 |  |  |  |
| 17 |  |  |  |
| 18 |  |  |  |
| 19 |  |  |  |
| 20 |  |  |  |
| 21 |  |  |  |
| 22 |  |  |  |
| 23 |  |  |  |
| 24 |  |  |  |
| 25 |  |  |  |
| 26 |  |  |  |
| 27 |  |  |  |
| 28a |  |  |  |
| 28b |  |  |  |
| 29 |  |  |  |
| 30 |  |  |  |
